# Supplementary material
Source: ML conference proceedings conference paper supplement (https://proceedings.neurips.cc/paper_files/paper/2020/hash/6d0c932802f6953f70eb20931645fa40-Abstract.html)
Supplement: Supplementary file [file 6d0c932802f6953f70eb20931645fa40-Supplemental.zip]

## Appendix

### 9 Preservation of Convexity and Submodularity

**Proposition 1.** *If  $f$  is convex, then  $g_P(\mathbf{y}, \theta) = f(P\mathbf{y}, \theta)$  is convex.*

*Proof.* The convexity can be simply verified by computing the second-order derivative:

$$\frac{d^2 g}{d\mathbf{y}^2} = \frac{d^2 f(P\mathbf{y}, \theta)}{d\mathbf{y}^2} = P^\top \frac{d^2 f}{d\mathbf{x}^2} P \succeq 0$$

where the last inequality comes from the convexity of  $f$ , i.e.,  $\frac{d^2 f}{d\mathbf{x}^2} \succeq 0$ .  $\square$

**Proposition 2.** *If  $f$  is DR-submodular and  $P \geq 0$ , then  $g_P(\mathbf{y}, \theta) = f(P\mathbf{y}, \theta)$  is DR-submodular.*

*Proof.* Assume  $f$  has the property of diminishing return submodularity (DR-submodular) [7]. According to definition of continuous DR-submodularity, we have:

$$\nabla_{\mathbf{x}_i, \mathbf{x}_j}^2 f(\mathbf{x}, \theta) \leq 0 \quad \forall i, j \in [n], \mathbf{y}$$

After applying the reparameterization, we can write:

$$g_P(\mathbf{y}, \theta) = f(\mathbf{x}, \theta)$$

and the second-order derivative:

$$\nabla_{\mathbf{y}}^2 g_P(\mathbf{y}, \theta) = P^\top \nabla_{\mathbf{x}}^2 f_P(\mathbf{x}, \theta) P \leq 0$$

Since all the entries of  $P$  are non-negative and all the entries of  $\nabla_{\mathbf{x}}^2 f_P(\mathbf{x}, \theta)$  are non-positive by DR-submodularity, the product  $\nabla_{\mathbf{y}}^2 g_P(\mathbf{y}, \theta)$  also has all the entries being non-positive, which satisfies the definition of DR-submodularity.  $\square$

### 10 Quasiconvexity in Reparameterization Matrix

**Proposition 3.**  *$\text{OPT}(\theta, P) = \min_{\mathbf{y} \text{ feasible}} g_P(\mathbf{y}, \theta)$  is not globally quasiconvex in  $P$ .*

*Proof.* Without loss of generality, let us ignore the effect of  $\theta$  and write  $g_P(\mathbf{y}) = f(P\mathbf{x})$ . In this proof, we will construct a strongly convex function  $f$  where the induced optimal value function  $\text{OPT}(P) := \min_{\mathbf{y}} g_P(\mathbf{y})$  is not quasiconvex.

Consider  $\mathbf{x} = [\mathbf{x}_1, \mathbf{x}_2, \mathbf{x}_3]^\top \in \mathbb{R}^3$ . Define  $f(\mathbf{x}) = \left\| \mathbf{x} - \begin{pmatrix} 1 \\ 1 \\ 1 \end{pmatrix} \right\|^2 \geq 0$  for all  $\mathbf{x} \in \mathbb{R}^3$ . Define  $P =$

$\begin{pmatrix} 1 & 0 \\ 1 & 0 \\ 0 & 2 \end{pmatrix}$  and  $P' = \begin{pmatrix} 0 & 1 \\ 0 & 1 \\ 2 & 0 \end{pmatrix}$ . Apparently,  $\mathbf{x}^* = \begin{pmatrix} 1 \\ 1 \\ 1 \end{pmatrix} = P \begin{pmatrix} 1 \\ 0.5 \end{pmatrix}$  and  $\mathbf{x}^* = \begin{pmatrix} 1 \\ 1 \\ 1 \end{pmatrix} = P' \begin{pmatrix} 0.5 \\ 1 \end{pmatrix}$  are

both achievable. So the optimal values  $\text{OPT}(P) = \text{OPT}(P') = 0$ . But the combination  $P'' = \frac{1}{2}P +$

$\frac{1}{2}P' = \begin{pmatrix} 0.5 & 0.5 \\ 0.5 & 0.5 \\ 1 & 1 \end{pmatrix}$  cannot, which results in an optimal value  $\text{OPT}(P'') = \min_{\mathbf{y}} g_{P''}(\mathbf{y}) = > 0$

since  $\begin{pmatrix} 1 \\ 1 \\ 1 \end{pmatrix} \notin \text{span}(P'')$ . This implies  $\text{OPT}(\frac{1}{2}P + \frac{1}{2}P') = \text{OPT}(P'') > 0 = \frac{1}{2}\text{OPT}(P) + \frac{1}{2}\text{OPT}(P')$ .

Thus  $\text{OPT}(P)$  is not globally convex in the feasible domain.  $\square$

**Theorem 1.** *If  $f(\cdot, \theta)$  is quasiconvex, then  $\text{OPT}(\theta, P) = \min_{\mathbf{y} \text{ feasible}} g_P(\mathbf{y}, \theta)$  is quasiconvex in  $P_i$  for any  $1 \leq i \leq m$ , where  $P = [P_1, P_2, \dots, P_m] \geq 0$ .*

467 *Proof.* Let us assume  $P = [p_1, p_2, \dots, p_m]$  and  $P' = [p'_1, p'_2, \dots, p'_m]$ , where  $p_i = p'_i \forall i \neq 1$  with  
 468 only the first column different. In the optimization problem parameterized by  $P$ , there is an optimal  
 469 solution  $x = \sum_{i=1}^m p_i y_i$ ,  $y_i \geq 0 \forall i$ . Similarly, there is an optimal solution  $x' = \sum_{i=1}^m p'_i y'_i$ ,  $y'_i \geq 0 \forall i$   
 470 for the optimization problem parameterized by  $P'$ . We know that  $f(x) = h(P)$ ,  $f(x') = h(P')$ .  
 471 Denote  $P'' = cP + (1-c)P' = [p''_1, p''_2, \dots, p''_m]$  to be a convex combination of  $P$  and  $P'$ . Clearly,  
 472  $p''_1 = cp_1 + (1-c)p'_1$  and  $p''_i = p_i = p'_i \forall i \neq 1$ . Then we can construct a solution

$$\begin{aligned} x'' &= \frac{1}{\frac{c}{y_1} + \frac{1-c}{y'_1}} \left( \frac{c}{y_1} x + \frac{1-c}{y'_1} x' \right) \\ &= \frac{1}{\frac{c}{y_1} + \frac{1-c}{y'_1}} \left( \frac{c}{y_1} \sum_{i=1}^m p_i y_i + \frac{1-c}{y'_1} \sum_{i=1}^m p'_i y'_i \right) \\ &= \frac{1}{\frac{c}{y_1} + \frac{1-c}{y'_1}} (cp_1 + (1-c)p'_1) + \frac{1}{\frac{c}{y_1} + \frac{1-c}{y'_1}} \sum_{i=2}^m p_i \left( \frac{y_i}{y_1} + \frac{y'_i}{y'_1} \right) \\ &\in \text{Span}(P'') \end{aligned}$$

473 Thus,  $x''$  is a feasible solution in the optimization problem parameterized by  $P''$ . By the convexity of  
 474  $f$ , we also know that

$$\begin{aligned} h(cP + (1-c)P') &= h(P'') \leq f(x'') \\ &= f\left(\frac{1}{\frac{c}{y_1} + \frac{1-c}{y'_1}} \left( \frac{c}{y_1} x + \frac{1-c}{y'_1} x' \right)\right) \\ &\leq \max(f(x), f(x')) \\ &= \max(h(P), h(P')) \end{aligned}$$

475 When one of  $y_1, y'_1$  is 0, without loss of generality we assume  $y_1 = 0$ . Then we can construct  
 476 a solution  $x'' = x$  which is still feasible in the optimization problem parameterized by  $P'' =$   
 477  $cP + (1-c)P'$ . Then we have the following:

$$h(P'') \leq f(x'') = f(x) = h(P) \leq \max(h(P), h(P'))$$

478 which concludes the proof. □

## 479 11 Sample Complexity of Learning Predictive Model in Surrogate Problem

480 **Theorem 2.** Let  $\mathcal{H}_{lin}$  be the hypothesis class of all linear function mappings from  $\xi \in \Xi \subset \mathbb{R}^p$  to  
 481  $\theta \in \Theta \subset \mathbb{R}^n$ , and let  $P \in \mathbb{R}^{n \times m}$  be a linear reparameterization used to construct the surrogate. The  
 482 expected Rademacher complexity over  $t$  i.i.d. random samples drawn from  $\mathcal{D}$  can be bounded by:

$$\text{Rad}^t(\mathcal{H}_{lin}) \leq 2mC \sqrt{\frac{2p \log(2mt \|P^+\| \rho_2(S))}{t}} + O\left(\frac{1}{t}\right) \quad (4)$$

483 where  $C$  is the gap between the optimal solution quality and the worst solution quality,  $\rho_2(S)$  is the  
 484 diameter of the set  $S$ , and  $P^+$  is the pseudoinverse.

485 The proof of Theorem 2 relies on the results given by Balghithi et al. [11]. Balghithi et al. analyzed  
 486 the sample complexity of predict-then-optimize framework when the optimization problem is a  
 487 constrained linear optimization problem.

488 The sample complexity depends on the hypothesis class  $\mathcal{H}$ , mapping from the feature space  $\Xi$  to  
 489 the parameter space  $\Theta$ .  $\mathbf{x}_S^*(\theta) = \arg\min_{\mathbf{x} \in S} f(\mathbf{x}, \theta)$  characterizes the optimal solution with given  
 490 parameter  $\theta \in \Theta$  and feasible region  $S$ . This can be obtained by solving any linear program solver  
 491 with given parameters  $\theta$ . The optimization gap with given parameter  $P$  is defined as  $\omega_S(\theta) :=$   
 492  $\max_{\mathbf{x} \in S} f(\mathbf{x}, \theta) - \min_{\mathbf{x} \in S} f(\mathbf{x}, \theta)$ , and  $\omega_S(\Theta) := \sup_{\theta \in \Theta} \omega_S(\theta)$  is defined as the upper bound on  
 493 optimization gap of all the possible parameter  $\theta \in \Theta$ .  $\mathbf{x}^*(\mathcal{H}) := \{\xi \rightarrow \mathbf{x}^*(\Phi(\xi)) | \Phi \in \mathcal{H}\}$  is the  
 494 set of all function mappings from features  $\xi$  to the predictive parameters  $\theta = \Phi(\xi)$  and then to the  
 495 optimal solution  $\mathbf{x}^*(\theta)$ .

496 **Definition 1** (Natarajan dimension). Suppose that  $S$  is a polyhedron and  $\mathfrak{S}$  is the set of its extreme  
 497 points. Let  $\mathcal{F} \in \mathfrak{S}^\Xi$  be a hypothesis space of function mappings from  $\Xi$  to  $\mathfrak{S}$ , and let  $A \in \Xi$  to be  
 498 given. We say that  $\mathcal{F}$  shatters  $A$  if there exists  $g_1, g_2 \in \mathcal{F}$  such that

- 499 •  $g_1(\xi) \neq g_2(\xi) \forall \xi \in A$ .
- 500 • For all  $B \subset A$ , there exists  $g \in \mathcal{F}$  such that (i) for all  $\xi \in B$ ,  $g(\xi) = g_1(\xi)$  and (ii) for all  
 501  $\xi \in A \setminus B$ ,  $g(\xi) = g_2(\xi)$ .

502 The Natarajan dimension of  $\mathcal{F}$ , denoted by  $d_N(\mathcal{F})$ , is the maximum cardinality of a set  $N$ -shattered  
 503 by  $\mathcal{F}$ .

504 We first state their results below:

505 **Theorem 3** (Balghiti et al. [11] Theorem 2). Suppose that  $S$  is a polyhedron and  $\mathfrak{S}$  is the set of its  
 506 extreme points. Let  $\mathcal{H}$  be a family of functions mapping from features  $\Xi$  to parameters  $\Theta \in \mathbb{R}^n$  with  
 507 decision variable  $\mathbf{x} \in \mathbb{R}^n$  and objective function  $f(\mathbf{x}, \theta) = \theta^\top \mathbf{x}$ . Then we have that

$$\text{Rad}^t(\mathcal{H}) \leq \omega_S^*(\Theta) \sqrt{\frac{2d_N(\mathbf{x}^*(\mathcal{H})) \log(t|\mathfrak{S}|^2)}{t}}. \quad (5)$$

508 where  $\text{Rad}^t$  denotes the Radamacher complexity averaging over all the possible realization of  $t$  i.i.d.  
 509 samples drawn from distribution  $\mathcal{D}$ .

510 The following corollary provided by Balghiti et al. [11] introduces a bound on Natarajan dimension  
 511 of linear hypothesis class  $\mathcal{H}$ , mapping from  $\Xi \in \mathbb{R}^p$  to  $\Theta \in \mathbb{R}^n$ :

512 **Corollary 1** (Balghiti et al. [11] Corollary 1). Suppose that  $S$  is a polyhedron and  $\mathfrak{S}$  is the set of its  
 513 extreme points. Let  $\mathcal{H}_{\text{lin}}$  be the hypothesis class of all linear functions, i.e.,  $\mathcal{H}_{\text{lin}} = \{\xi \rightarrow B\xi \mid B \in$   
 514  $\mathbb{R}^{n \times p}\}$ . Then we have

$$d_N(\mathbf{x}^*(\mathcal{H}_{\text{lin}})) \leq np \quad (6)$$

515 Also  $|\mathfrak{S}|$  can be estimated by constructing an  $\epsilon$ -covering of the feasible region by open balls with  
 516 radius  $\epsilon$ . Let  $\hat{\mathfrak{S}}_\epsilon$  be the centers of all these open balls. We can choose  $\epsilon = \frac{1}{t}$  and the number of open  
 517 balls required to cover  $S$  can be estimated by

$$|\hat{\mathfrak{S}}_\epsilon| \leq (2t\rho_2(S)\sqrt{n})^n \quad (7)$$

518 Combining Equation 5, 6, and 7, the Radamacher complexity can be bounded by:

**Corollary 2** (Balghiti et al. [11] Corollary 2).

$$\text{Rad}^t(\mathcal{H}_{\text{lin}}) \leq 2n\omega_S(\Theta) \sqrt{\frac{2p \log(2nt\rho_2(S))}{t}} + O\left(\frac{1}{t}\right) \quad (8)$$

519 Now we are ready to prove Theorem 2:

520 *Proof of Theorem 2.* Now let us consider our case. We have a linear mapping from features  $\xi \in$   
 521  $X_i \subset \mathbb{R}^p$  to the parameters  $\theta = B\xi \in \Theta \in \mathbb{R}^n$  with  $B \in \mathbb{R}^{n \times p}$ . The objective function is formed by

$$g_P(\mathbf{y}, \theta) = f(P\mathbf{y}, \theta) = \theta^\top P\mathbf{y} = (P^\top \theta)^\top \mathbf{y} = (P^\top B\xi)^\top \mathbf{y} \quad (9)$$

522 This is equivalent to have a linear mapping from  $\xi \in \Xi \subset \mathbb{R}^p$  to  $\theta' = P^\top B\xi$  where  $P^\top B \in \mathbb{R}^{m \times p}$ ,  
 523 and the objective function is just  $g_P(\mathbf{y}, \theta') = \theta'^\top \mathbf{y}$ . This yields a similar bound but with a smaller  
 524 dimension  $m \ll n$  as in Equation 10:

$$\text{Rad}^t(\mathcal{H}_{\text{lin}}) \leq 2m\omega_S(\Theta) \sqrt{\frac{2p \log(2mt\rho_2(S'))}{t}} + O\left(\frac{1}{t}\right) \quad (10)$$

525 where  $\omega_S(\Theta)$  is unchanged because the optimality gap is not changed by the reparameterization. The  
 526 only thing changed except for the substitution of  $m$  is that the feasible region  $S'$  is now defined in a

527 lower-dimensional space under reparameterization  $P$ . But since  $\forall \mathbf{y} \in S'$ , we have  $P\mathbf{y} \in S$  too. So  
 528 the diameter of the new feasible region can also be bounded by:

$$\begin{aligned}
 \rho(S') &= \max_{\mathbf{y}, \mathbf{y}' \in S'} \|\mathbf{y} - \mathbf{y}'\| \\
 &= \max_{\mathbf{y}, \mathbf{y}' \in S'} \|P^+ P(\mathbf{y} - \mathbf{y}')\| \\
 &= \max_{\mathbf{y}, \mathbf{y}' \in S'} \|P^+(P\mathbf{y} - P\mathbf{y}')\| \\
 &\leq \max_{\mathbf{x}, \mathbf{x}' \in S'} \|P^+(\mathbf{x} - \mathbf{x}')\| \\
 &\leq \|P^+\| \max_{\mathbf{x}, \mathbf{x}' \in S'} \|\mathbf{x} - \mathbf{x}'\| \\
 &= \|P^+\| \rho(S)
 \end{aligned}$$

529 where  $P^+ \in \mathbb{R}^{m \times n}$  is the pseudoinverse of the reparameterization matrix  $P$  with  $P^+ P = I \in \mathbb{R}^{m \times m}$   
 530 (assuming the matrix does not collapse). Substituting the term  $\rho(S')$  in Equation 10, we can get the  
 531 bound on the Radamacher complexity in Equation 4, which concludes the proof of Theorem 2.  $\square$

## 532 12 Non-linear Reparameterization

533 The main reason that we use a linear reparameterization is to maintain the convexity of the inequality  
 534 constraints and the linearity of the equality constraints. Instead, if we apply a convex reparameteriza-  
 535 tion  $\mathbf{x} = P(\mathbf{y})$ , e.g., an input convex neural network [3], then the inequality constraints will remain  
 536 convex but the equality constraints will no longer be affine anymore. So such convex reparameter-  
 537 ization can be useful when there is no equality constraint. Lastly, we can still apply non-convex  
 538 reparameterization but it can create non-convex inequality and equality constraints, which can be  
 539 challenging to solve. All of these imply that the choice of reparameterization should depend on the  
 540 type of optimization problem to make sure we do not lose the scalability while solving the surrogate  
 541 problem.

## 542 13 Computing Infrastructure

543 All experiments were run on the computing cluster, where each node configured with 2 Intel Xeon  
 544 Cascade Lake CPUs, 184 GB of RAM, and 70 GB of local scratch space. Within each experiment,  
 545 we did not implement parallelization. So each experiment was purely run on a single CPU core. The  
 546 main bottleneck of the computation is on solving the optimization problem, where we use Scipy [41]  
 547 blackbox optimization solver. No GPU was used to train the neural network and throughout the  
 548 experiments.
